# Supplementary material
Source: HighWire-hosted journal article supplement (https://bmjopen.bmj.com/content/9/12/e033158)
Supplement: inline-supplementary-material-4 [file inline-supplementary-material-4.pdf]

**Supplementary Table.** Factors associated with unsuccessful treatment outcome among patients with tuberculosis notified and initiated on first-line anti-TB treatment in public sector at city Tuberculosis centre Vadodara, India between April and September 2018 (n=889\*)

| Characteristics    | Category           | Total |      | Unsuccessful outcome <sup>^</sup> |      | Unadjusted RR (95% CI) † | Adjusted RR (95% CI) † |
|--------------------|--------------------|-------|------|-----------------------------------|------|--------------------------|------------------------|
|                    |                    | n=889 | (%)  | n=112                             | (%)  |                          |                        |
| Age in years       | Below 15           | 30    | 3.4  | 2                                 | 6.7  | 0.5 (0.1-2.1)            | 0.2 (0.1-0.8)          |
|                    | 15-59              | 761   | 85.6 | 95                                | 12.5 | 1                        | 1                      |
|                    | 60 and above       | 98    | 11.0 | 15                                | 15.3 | 1.2 (0.7-2.0)            | 0.7 (0.3-1.4)          |
| Gender             | Male               | 586   | 65.9 | 80                                | 13.7 | 1                        | 1                      |
|                    | Female             | 303   | 34.1 | 32                                | 10.6 | 0.8 (0.5-1.2)            | 1.1 (0.7-1.7)          |
| HIV <sup>§</sup>   | Reactive           | 22    | 2.7  | 5                                 | 22.7 | 2.2 (0.8-6.0)            | 0.8 (0.2-2.9)          |
|                    | Non-reactive       | 798   | 97.3 | 96                                | 12.0 | 1                        | 1                      |
| Patient type       | New                | 695   | 78.2 | 61                                | 8.8  | 1                        | 1                      |
|                    | Previously treated | 194   | 21.8 | 51                                | 26.3 | 3.7 (2.5-5.6)            | 2.0 (1.3-3.1)          |
| Tuberculosis site  | Pulmonary          | 688   | 77.4 | 102                               | 14.8 | 1                        | 1                      |
|                    | Extra pulmonary    | 201   | 22.6 | 10                                | 5.0  | 0.3 (0.2-0.6)            | 0.4 (0.2-0.9)          |
| DBT receipt status | Non-recipients     | 238   | 26.8 | 58                                | 24.4 | 3.6 (2.4-5.4)            | 4.0 (2.6-6.1)          |
|                    | Recipients         | 651   | 73.2 | 54                                | 8.3  | 1                        | 1                      |

\* Due to very low numbers for treatment outcome and DBT (direct benefit transfer cash incentive) among private sector patients, only public sector patients were considered for the analysis

<sup>^</sup> Unsuccessful treatment outcome- failure, loss to follow up, died, treatment regimen changed  
Successful treatment outcome- cured, treatment completed

† RR- Relative Risk, CI- Confidence interval

<sup>§</sup>Information was not available for 69 patients about HIV status
